# Supplementary material
Source: publisher figshare collection journal article supplement (https://gsapubs.figshare.com/ndownloader/files/23347424)
Supplement: Supplementary file 1 [file 23347424]

## Sheet: J3R1-66_Ol1 P1f
Sample	J3R1-66	J3R1-66	J3R1-66	J3R1-66	J3R1-66	J3R1-66	J3R1-66	J3R1-66	J3R1-66	J3R1-66	J3R1-66	J3R1-66	J3R1-66	J3R1-66	J3R1-66	J3R1-66	J3R1-66	J3R1-66	J3R1-66	J3R1-66	J3R1-66	J3R1-66	J3R1-66	J3R1-66	J3R1-66	J3R1-66	J3R1-66	J3R1-66	J3R1-66	J3R1-66	J3R1-66	J3R1-66	J3R1-66	J3R1-66	J3R1-66	J3R1-66	J3R1-66	J3R1-66	J3R1-66	J3R1-66	J3R1-66
Comment	Ol1-1	Ol1-2	Ol1-3	Ol1-4	Ol1-5	Ol1-6	Ol1-7	Ol1-8	Ol1-9	Ol1-10	Ol1-11	Ol1-12	Ol1-13	Ol1-14	Ol1-15	Ol1-16	Ol1-17	Ol1-18	Ol1-19	Ol1-20	Ol1-21	Ol1-22	Ol1-23	Ol1-24	Ol1-25	Ol1-26	Ol1-27	Ol1-28	Ol1-29	Ol1-30	Ol1-31	Ol1-32	Ol1-33	Ol1-34	Ol1-35	Ol1-36	Ol1-37	Ol1-38	Ol1-39	Ol1-40	Ol1-41
wt% Oxides
MgO	41.4763	41.2372	41.4019	41.3714	41.3243	41.2412	41.3033	41.1705	41.227	41.1873	41.3521	41.2325	41.209	41.2229	41.0966	41.0634	41.0698	41.1455	41.0643	41.1164	41.2681	41.072	41.2085	41.2283	41.0941	41.215	41.256	41.0894	40.9896	41.0308	40.9248	40.9629	40.8735	40.9652	41.0403	40.9836	41.0099	41.3202	41.1049	41.0278	41.341
Al2O3	0.0353	0.0343	0.0492	0.016	0.024	0.0149	0.0174	0.0229	0.0126	0.0156	0.0305	0.0117	0.0313	0.0158	0.0318	0.022	0.0181	0.0135	0.0249	0.0389	0.0231	0.0114	0.0369	0.022	0.0103	0.0327	0.0261	0.0188	0.0263	0.0261	0.0266	0.0108	0.0327	0.0238	0.0242	0.0304	0.0105	0	0.0133	0.021	0.0304
SiO2	39.1305	39.0396	39.1284	39.4848	39.2653	38.8658	39.2284	39.0832	39.0903	39.1828	38.8835	38.6306	39.1693	39.2836	39.0662	39.2012	39.1659	38.7131	39.4364	38.881	39.326	38.8642	38.945	38.743	39.3017	38.9772	38.7459	39.0379	38.8729	38.8951	38.6539	38.8687	38.7632	38.9148	39.262	38.8796	38.9297	38.909	39.3534	39.2064	39.4225
CaO	0.0316	0.0281	0.0593	0.0212	0.0252	0.0339	0.0261	0.0448	0.033	0.0317	0.0352	0.0415	0.0487	0.0379	0.0329	0.0444	0.0403	0.0451	0.047	0.0401	0.0482	0.0391	0.037	0.0385	0.0287	0.0404	0.0426	0.0469	0.0325	0.0475	0.031	0.0384	0.0382	0.0292	0.0354	0.0361	0.0385	0.0222	0.0315	0.0355	0.0366
Cr2O3	0.0089	0	0	0	0.0069	0.0079	0.001	0.0257	0	0	0.0059	0	0.003	0	0	0.0099	0	0.0158	0	0.002	0.0118	0.0099	0.0207	0.0158	0	0.0138	0.0177	0.0059	0.0128	0.0069	0.0108	0.0207	0.0148	0.0286	0	0.0049	0	0	0	0.0049	0
MnO	0.29	0.3023	0.2858	0.2957	0.3144	0.2827	0.2695	0.2818	0.3258	0.2941	0.2598	0.3048	0.3128	0.2525	0.3128	0.3039	0.2791	0.3128	0.276	0.2784	0.2433	0.2948	0.2988	0.2802	0.3167	0.3063	0.298	0.2974	0.2891	0.3055	0.2539	0.3284	0.2833	0.2974	0.2883	0.2533	0.3118	0.3491	0.3112	0.3079	0.2833
FeO	19.0606	18.8849	19.3532	19.0208	19.1901	18.8175	19.0361	19.0747	19.231	18.9174	19.014	18.7098	19.1612	18.8593	19.2002	18.928	19.4924	19.1681	19.3518	19.3446	19.4261	18.9552	19.3588	18.892	19.381	19.0235	19.3614	18.9757	19.1558	18.9465	19.3321	18.9201	19.2516	18.9442	19.2487	18.9365	19.2532	18.6116	19.2589	19.1909	19.5723
NiO	0.1004	0.1046	0.1229	0.1312	0.1834	0.1494	0.1635	0.137	0.1427	0.1303	0.0963	0.1013	0.0979	0.1312	0.0647	0.1104	0.1344	0.0855	0.1278	0.1311	0.1129	0.1428	0.0963	0.1171	0.1402	0.1121	0.1212	0.1254	0.137	0.1029	0.1452	0.1544	0.1228	0.1121	0.1063	0.1171	0.1502	0.1321	0.1511	0.1104	0.1295
Total	100.134	99.631	100.401	100.341	100.334	99.4133	100.045	99.8406	100.062	99.7592	99.6773	99.0322	100.033	99.8032	99.8052	99.6832	100.2	99.4994	100.328	99.8325	100.459	99.3894	100.002	99.3369	100.273	99.721	99.8689	99.5974	99.516	99.3613	99.3783	99.3044	99.3801	99.3153	100.005	99.2415	99.7038	99.3442	100.224	99.9048	100.816
Distance [µm]	0	27.6825	16.479	63.9313	79.2224	104.005	118.259	116.72	147.573	150.71	201.556	223.605	237.66	269.841	280.528	305.317	322.616	344.525	372.987	406.793	456.1	438.252	438.252	500.059	528.335	569.934	540.983	647.135	642.841	673.575	728.701	758.24	790.268	856.261	891.545	834.278	850.89	868.691	921.644	923.692	956.308

## Sheet: J3R1-66_Ol1 P2h
Sample	J3R1-66	J3R1-66	J3R1-66	J3R1-66	J3R1-66	J3R1-66	J3R1-66	J3R1-66	J3R1-66	J3R1-66	J3R1-66	J3R1-66
Comment	Ol1-50	Ol1-48	Ol1-49	Ol1-47	Ol1-46	Ol1-45	Ol1-44	Ol1-22	Ol1-23	Ol1-21	Ol1-25	Ol1-24
wt% Oxides
MgO	41.0628	41.2627	41.1827	41.0879	41.0446	41.0486	41.0775	41.072	41.2085	41.2681	41.0941	41.2283
Al2O3	0.0119	0.014	0.0181	0.024	0.0327	0.0389	0.0245	0.0114	0.0369	0.0231	0.0103	0.022
SiO2	39.1554	39.2777	39.1836	39.079	39.3612	39.1213	39.4216	38.8642	38.945	39.326	39.3017	38.743
CaO	0.0669	0.0313	0.0454	0.0407	0.0335	0.039	0.0424	0.0391	0.037	0.0482	0.0287	0.0385
Cr2O3	0	0	0	0.0108	0	0.0187	0	0.0099	0.0207	0.0118	0	0.0158
MnO	0.2983	0.2736	0.2729	0.2726	0.303	0.2628	0.2696	0.2948	0.2988	0.2433	0.3167	0.2802
FeO	18.9214	19.3854	18.9224	19.554	19.1174	19.3755	19.3126	18.9552	19.3588	19.4261	19.381	18.892
NiO	0.1179	0.093	0.1304	0.146	0.176	0.1776	0.083	0.1428	0.0963	0.1129	0.1402	0.1171
Total	99.6346	100.338	99.7555	100.215	100.068	100.082	100.231	99.3894	100.002	100.459	100.273	99.3369
Distance [µm]	0	7.6405	22.8662	113.978	163.588	191.827	220.066	321.728	321.728	420.216	587.766	615.143

## Sheet: J3R1-66_Ol2 P1f
Sample	J3R1-66	J3R1-66	J3R1-66	J3R1-66	J3R1-66	J3R1-66	J3R1-66	J3R1-66	J3R1-66	J3R1-66	J3R1-66	J3R1-66	J3R1-66	J3R1-66	J3R1-66	J3R1-66	J3R1-66	J3R1-66	J3R1-66	J3R1-66	J3R1-66	J3R1-66	J3R1-66	J3R1-66	J3R1-66	J3R1-66	J3R1-66	J3R1-66
Comment	Ol2-51	Ol2-52	Ol2-54	Ol2-53	Ol2-55	Ol2-56	Ol2-57	Ol2-58	Ol2-60	Ol2-59	Ol2-61	Ol2-62	Ol2-63	Ol2-64	Ol2-65	Ol2-66	Ol2-67	Ol2-68	Ol2-90	Ol2-69	Ol2-70	Ol2-71	Ol2-72	Ol2-73	Ol2-74	Ol2-75	Ol2-76	Ol2-77
wt% Oxides
MgO	40.9138	41.0695	40.886	41.063	40.9659	40.9834	40.8421	40.7305	41.16	40.7983	41.0746	40.8703	41.0716	41.0595	41.1921	41.1668	41.0705	41.0735	41.1978	41.0624	41.1391	41.1984	41.2821	41.3449	41.2795	40.9583	41.0767	40.8706
Al2O3	0.0247	0.0222	0.0252	0.0169	0.0229	0.0126	0.0103	0.0135	0.0146	0.0188	0.0211	0.0096	0.0101	0.0295	0.0057	0	0.0204	0.0064	0.0236	0.0204	0.0176	0.0103	0.0064	0.0309	0.0211	0.011	0.0069	0.0117
SiO2	39.4296	39.1361	38.8239	39.2295	38.8737	39.3907	38.8594	38.8548	39.2069	38.9866	39.0895	39.1016	39.0506	39.2184	39.1028	38.9061	38.8321	39.1902	39.1144	38.8386	38.8123	39.1876	38.9901	39.2257	39.1696	38.5637	39.0893	38.8724
CaO	0.0273	0.0397	0.0397	0.0444	0.0376	0.0283	0.0382	0.0353	0.0386	0.0366	0.0466	0.0441	0.0391	0.0477	0.0378	0.0307	0.0358	0.0571	0.0347	0.0315	0.0292	0.0368	0.0434	0.0397	0.0461	0.0367	0.0437	0.1212
Cr2O3	0.003	0	0	0	0.0039	0	0	0	0.0158	0.0158	0.001	0.0247	0	0	0	0.0069	0.0069	0.001	0.003	0	0.0089	0.0069	0	0.0099	0.0168	0.0099	0	0
MnO	0.2662	0.2982	0.2957	0.3193	0.3315	0.2664	0.3104	0.3266	0.295	0.3095	0.343	0.3054	0.3264	0.2868	0.2817	0.2958	0.3013	0.295	0.3096	0.3226	0.2533	0.3128	0.2869	0.2867	0.2835	0.2727	0.2917	0.2957
FeO	19.3057	19.0219	19.0227	19.2345	19.2694	19.0147	18.9942	19.2285	18.996	19.2194	19.3016	19.2261	19.6952	18.9569	19.3049	18.9499	19.3171	18.9772	19.216	19.2021	19.059	19.3017	18.8892	19.3512	19.19	19.2848	18.9971	19.0102
NiO	0.1478	0.1237	0.1445	0.1478	0.1253	0.1312	0.1428	0.1444	0.1088	0.1262	0.1278	0.137	0.1643	0.1071	0.1337	0.1478	0.132	0.1312	0.1146	0.1079	0.088	0.1536	0.1429	0.0955	0.1121	0.1452	0.1412	0.1054
Total	100.118	99.7113	99.2377	100.055	99.6302	99.8273	99.1974	99.3336	99.8357	99.5112	100.005	99.7188	100.357	99.7059	100.059	99.504	99.7161	99.7316	100.014	99.5855	99.4074	100.208	99.641	100.385	100.119	99.2823	99.6466	99.2872
Distance [µm]	0	12.5207	32.4938	38.2066	48.4807	53.9357	58.6607	71.697	81.0948	84.1018	109.869	116.089	138.411	178.594	191.484	219.132	257.352	290.838	336.698	368.385	385.515	400.175	421.565	498.219	552.559	604.656	639.495	690.377

## Sheet: J3R1-66_Ol2 P2f
Sample	J3R1-66	J3R1-66	J3R1-66	J3R1-66	J3R1-66	J3R1-66	J3R1-66	J3R1-66	J3R1-66	J3R1-66	J3R1-66	J3R1-66	J3R1-66	J3R1-66	J3R1-66	J3R1-66	J3R1-66	J3R1-66	J3R1-66	J3R1-66	J3R1-66	J3R1-66	J3R1-66	J3R1-66	J3R1-66	J3R1-66	J3R1-66	J3R1-66	J3R1-66
Comment	Ol2-79	Ol2-80	Ol2-81	Ol2-82	Ol2-78	Ol2-83	Ol2-84	Ol2-85	Ol2-86	Ol2-87	Ol2-88	Ol2-89	Ol2-90	Ol2-68	Ol2-72	Ol2-69	Ol2-70	Ol2-91	Ol2-71	Ol2-92	Ol2-93	Ol2-94	Ol2-96	Ol2-95	Ol2-97	Ol2-98	Ol2-99	Ol2-100	Ol2-101
wt% Oxides
MgO	40.9657	41.0379	40.9441	41.073	40.9558	41.0366	41.162	41.254	41.1666	41.1692	41.3971	40.9446	41.1978	41.0735	41.2821	41.0624	41.1391	41.2328	41.1984	41.1149	41.0462	41.1082	41.0895	41.1272	41.0445	41.1514	41.0572	41.1159	41.0564
Al2O3	0.0211	0.0158	0.0163	0.0142	0.0192	0.0053	0.0128	0	0.0172	0.0041	0.024	0.0247	0.0236	0.0064	0.0064	0.0204	0.0176	0.0071	0.0103	0.0037	0.0094	0.0037	0.0053	0.0334	0.005	0.033	0.0231	0.0144	0.0172
SiO2	38.8542	38.9898	38.8797	38.9877	39.0602	39.1133	38.9469	39.1431	39.0986	39.1342	39.1755	39.22	39.1144	39.1902	38.9901	38.8386	38.8123	39.3032	39.1876	39.4741	39.4771	39.4577	39.1961	39.095	38.8765	39.2389	39.2959	38.612	39.1387
CaO	0.034	0.0267	0.0311	0.0414	0.0391	0.0417	0.0352	0.0376	0.0291	0.0272	0.0322	0.0227	0.0347	0.0571	0.0434	0.0315	0.0292	0.0412	0.0368	0.0415	0.0354	0.0364	0.0339	0.0399	0.0416	0.0331	0.0305	0.0563	0.0441
Cr2O3	0	0	0	0	0.001	0.0079	0.0158	0	0	0	0	0	0.003	0.001	0	0	0.0089	0	0.0069	0	0.0168	0	0	0.0118	0.001	0.0059	0.0039	0	0
MnO	0.3469	0.3235	0.2932	0.3193	0.2607	0.3005	0.3252	0.2842	0.2957	0.3282	0.2975	0.2981	0.3096	0.295	0.2869	0.3226	0.2533	0.3144	0.3128	0.3212	0.335	0.2622	0.3341	0.2842	0.2956	0.2769	0.3055	0.3121	0.2998
FeO	19.3898	18.9464	19.1896	19.2018	18.9858	19.218	18.9626	19.3075	19.2119	19.4079	18.8952	19.2311	19.216	18.9772	18.8892	19.2021	19.059	19.3292	19.3017	18.9858	19.0865	19.2721	19.2663	19.4077	19.3169	19.4378	19.2178	19.0911	19.2407
NiO	0.1295	0.1162	0.1112	0.1146	0.0914	0.1436	0.1436	0.1245	0.1079	0.161	0.1486	0.1063	0.1146	0.1312	0.1429	0.1079	0.088	0.1552	0.1536	0.1287	0.1154	0.1827	0.1063	0.0888	0.1336	0.098	0.1669	0.0855	0.127
Total	99.7412	99.4563	99.4652	99.752	99.4132	99.8669	99.6041	100.151	99.927	100.232	99.9701	99.8475	100.014	99.7316	99.641	99.5855	99.4074	100.383	100.208	100.07	100.122	100.323	100.032	100.088	99.7147	100.275	100.101	99.2873	99.9239
Distance [µm]	0	30.2981	48.2331	90.4812	112.084	151.742	167.108	212.832	241.841	257.66	312.442	314.739	370.126	411.689	445.272	482.422	510.795	539.562	557.658	581.357	610.133	657.631	694.982	695.828	755.699	801.151	808.779	864.528	893.224

## Sheet: J3R1-66_Ol3 P1f
Sample	J3R1-66	J3R1-66	J3R1-66	J3R1-66	J3R1-66	J3R1-66	J3R1-66	J3R1-66	J3R1-66	J3R1-66	J3R1-66	J3R1-66	J3R1-66	J3R1-66	J3R1-66	J3R1-66	J3R1-66	J3R1-66	J3R1-66	J3R1-66	J3R1-66	J3R1-66	J3R1-66
Comment	Ol3-104	Ol3-105	Ol3-102	Ol3-103	Ol3-106	Ol3-108	Ol3-109	Ol3-107	Ol3-110	Ol3-113	Ol3-111	Ol3-112	Ol3-115	Ol3-114	Ol3-116	Ol3-117	Ol3-118	Ol3-119	Ol3-120	Ol3-121	Ol3-122	Ol3-123	Ol3-124
wt% Oxides
MgO	40.713	40.6191	40.9733	40.9874	41.0708	41.0138	40.9824	41.0992	41.0946	41.1258	40.9853	40.8937	40.9705	40.875	40.9942	41.0815	40.9334	40.9864	40.933	41.2831	41.3978	41.215	41.3788
Al2O3	0.0219	0.0041	0.0325	0.016	0.0082	0.0117	0.0245	0.0094	0.0376	0.0126	0.0309	0.0252	0.0249	0.0286	0.0039	0.0117	0.0345	0.0231	0.0151	0.0138	0.0174	0.0231	0.0328
SiO2	39.2809	39.3873	39.3671	38.9443	39.0672	39.1652	38.8319	39.4638	38.9488	38.905	38.7121	39.2855	39.2415	39.0924	39.065	39.0881	39.1684	38.9691	39.1785	38.8374	39.3558	39.5982	38.9176
CaO	0.0386	0.0738	0.0379	0.0339	0.032	0.0328	0.0352	0.0258	0.0225	0.0398	0.0321	0.0332	0.0403	0.0287	0.0408	0.0353	0.04	0.0357	0.0354	0.0293	0.028	0.0222	0.0377
Cr2O3	0	0	0	0.0079	0.0168	0.0128	0	0.0039	0.0109	0.0227	0.0138	0.0099	0	0	0.0138	0	0.0059	0.0089	0	0	0	0.0118	0
MnO	0.2745	0.2933	0.2728	0.3358	0.2689	0.2901	0.3203	0.2443	0.2665	0.2908	0.2786	0.3066	0.3081	0.3293	0.2943	0.303	0.3228	0.312	0.3138	0.2842	0.2868	0.2893	0.2729
FeO	18.9294	19.1053	19.1909	19.081	18.8551	18.8889	19.0522	19.3275	18.8498	19.0607	19.0761	18.6536	18.9909	18.9159	18.8178	19.3474	18.9336	19.1778	18.9202	19.5104	19.1916	19.2326	19.0067
NiO	0.1279	0.1528	0.1279	0.1528	0.1138	0.1586	0.1254	0.1478	0.1296	0.1453	0.1453	0.1271	0.1478	0.1287	0.1321	0.1054	0.1271	0.1843	0.1611	0.1262	0.1287	0.0947	0.196
Total	99.3862	99.6357	100.002	99.5591	99.4328	99.5739	99.3719	100.322	99.3603	99.6027	99.2742	99.3348	99.724	99.3986	99.3619	99.9724	99.5657	99.6973	99.5571	100.084	100.406	100.487	99.8425
Distance [µm]	0	36.886	57.6124	80.3819	94.6648	128.491	172.107	205.323	235.09	275.36	303.722	341.431	401.382	416.211	495.539	589.649	623.429	663.615	706.316	757.198	870.103	936.007	968.437

## Sheet: J5R1-131_Ol2 P1h
Sample	J5R1-131	J5R1-131	J5R1-131	J5R1-131	J5R1-131	J5R1-131	J5R1-131	J5R1-131	J5R1-131	J5R1-131	J5R1-131	J5R1-131	J5R1-131	J5R1-131	J5R1-131	J5R1-131	J5R1-131
Comment	Ol2-174	Ol2-175	Ol2-176	Ol2-177	Ol2-178	Ol2-179	Ol2-181	Ol2-180	Ol2-182	Ol2-183	Ol2-184	Ol2-185	Ol2-186	Ol2-188	Ol2-187	Ol2-189	Ol2-190
wt% Oxides
MgO	41.8608	41.5887	41.5408	41.5962	41.7705	41.7371	42.3353	41.6155	41.6309	41.7062	41.5595	41.6934	41.7554	41.8533	41.6627	41.7854	41.343
Al2O3	0.0005	0.0254	0.0163	0.0183	0.006	0.019	0.0041	0.0076	0.0124	0.0179	0.0083	0.0275	0.0002	0.0294	0.0103	0.0153	0.0236
SiO2	39.4338	39.0591	38.9634	39.1494	39.1668	39.0375	39.3454	39.181	39.0059	38.9709	38.7587	38.9329	39.2459	38.6789	39.0184	39.4155	38.9163
CaO	0.045	0.0561	0.0293	0.0393	0.0318	0.033	0.0175	0.0381	0.0298	0.0347	0.034	0.0412	0.0385	0.0229	0.0373	0.0356	0.0357
Cr2O3	0	0	0	0.0109	0	0.0168	0.0278	0.0069	0.0059	0	0.006	0.0198	0.0327	0.0129	0	0	0.004
MnO	0.2897	0.3093	0.2628	0.3035	0.3095	0.2643	0.2836	0.2841	0.3316	0.2528	0.267	0.2447	0.2472	0.262	0.2784	0.2937	0.2719
FeO	18.3199	18.3968	18.2426	18.5908	18.0014	18.2413	17.7092	18.2657	18.0105	18.3973	17.8194	18.324	18.2647	18.0781	18.1068	18.6702	17.8805
NiO	0.1446	0.1712	0.1048	0.177	0.1222	0.1513	0.104	0.1646	0.0956	0.1288	0.1755	0.1505	0.1937	0.1247	0.1272	0.1113	0.1447
Total	100.094	99.6066	99.16	99.8854	99.4082	99.5003	99.8269	99.5635	99.1226	99.5086	98.6284	99.434	99.7783	99.0622	99.2411	100.327	98.6197
Distance [µm]	9.09495e-13	22.0758	37.4782	77.1006	109.812	177.936	204.142	229.631	260.362	294.331	388.858	480.773	524.348	537.063	561.813	624.74	677.621

## Sheet: J5R1-131_Ol3 P1h
Sample	J5R1-131	J5R1-131	J5R1-131	J5R1-131	J5R1-131	J5R1-131	J5R1-131	J5R1-131	J5R1-131	J5R1-131	J5R1-131	J5R1-131	J5R1-131	J5R1-131	J5R1-131	J5R1-131	J5R1-131	J5R1-131	J5R1-131	J5R1-131	J5R1-131	J5R1-131	J5R1-131	J5R1-131	J5R1-131	J5R1-131	J5R1-131	J5R1-131	J5R1-131	J5R1-131
Comment	Ol3-191	Ol3-192	Ol3-194	Ol3-193	Ol3-195	Ol3-196	Ol3-198	Ol3-197	Ol3-199	Ol3-200	Ol3-201	Ol3-202	Ol3-203	Ol3-204	Ol3-205	Ol3-206	Ol3-209	Ol3-207	Ol3-210	Ol3-208	Ol3-211	Ol3-212	Ol3-213	Ol3-214	Ol3-215	Ol3-216	Ol3-217	Ol3-218	Ol3-219	Ol3-220
wt% Oxides
MgO	41.8102	41.736	41.5933	41.6961	41.4383	41.5858	41.5683	41.6663	41.5589	41.5129	41.5057	41.5886	41.2811	41.818	41.4851	41.7836	41.7111	41.6585	41.4852	41.3599	41.6007	41.646	41.5711	41.8889	41.5365	41.9385	41.6753	41.6807	41.529	41.4948
Al2O3	0.0184	0.0268	0	0.0076	0.016	0.0089	0.0195	0.0288	0.0243	0.0179	0.0133	0.0256	0.0165	0.044	0.0233	0.0263	0	0.0179	0.0207	0.0151	0.0179	0.0144	0.017	0.0156	0.0108	0.0092	0.0057	0.0174	0.0142	0.0284
SiO2	38.9434	39.2769	39.3903	38.8925	39.3323	39.2369	39.012	39.5946	39.3459	39.2144	39.0754	39.5939	39.0398	39.7076	39.4582	39.5417	39.069	39.445	38.0253	39.5868	39.0432	39.685	39.2834	39.4578	39.1227	38.7267	39.295	39.429	39.4626	39.371
CaO	0.037	0.0425	0.0234	0.0366	0.0309	0.0348	0.036	0.0474	0.0419	0.0404	0.0426	0.0523	0.0474	0.0425	0.0379	0.0468	0.0293	0.0528	0.0507	0.0402	0.0403	0.0549	0.0486	0.0403	0.0427	0.0444	0.0237	0.0341	0.0443	0.0344
Cr2O3	0.0158	0.0109	0	0	0.0267	0.0218	0.0089	0.0079	0.0237	0	0.0089	0.0099	0.0178	0.004	0	0	0.0228	0.0327	0	0.0277	0.0129	0.001	0.0069	0.001	0.0208	0.003	0.0079	0	0.0109	0.0109
MnO	0.2749	0.2858	0.2399	0.2577	0.2691	0.2864	0.3013	0.279	0.301	0.2553	0.3184	0.3283	0.302	0.3018	0.311	0.2872	0.2628	0.2619	0.3111	0.293	0.3069	0.2929	0.3102	0.2792	0.3101	0.2612	0.2865	0.2563	0.2798	0.2758
FeO	18.5145	18.1767	18.116	18.5361	18.6105	18.471	18.0352	18.5944	18.6892	18.2391	18.3156	18.327	18.2741	18.6361	18.3172	18.6639	18.341	18.3448	17.9227	18.2044	18.2825	18.6513	18.5562	18.2234	18.5451	17.9952	18.2141	18.1052	18.5838	18.4228
NiO	0.1155	0.0856	0.1014	0.1471	0.1587	0.1529	0.1314	0.1463	0.138	0.1297	0.1347	0.123	0.0973	0.2027	0.1463	0.0956	0.1522	0.1297	0.1322	0.1521	0.1471	0.123	0.1247	0.1655	0.1463	0.1472	0.1463	0.1247	0.1521	0.1189
Total	99.7297	99.6412	99.4643	99.5737	99.8825	99.7985	99.1126	100.365	100.123	99.4097	99.4146	100.049	99.076	100.757	99.779	100.445	99.5882	99.9433	97.9479	99.6792	99.4515	100.469	99.9181	100.072	99.735	99.1254	99.6545	99.6474	100.077	99.757
Distance [µm]	0	17.8189	26.1997	34.3743	56.448	99.4159	109.299	132.578	141.455	179.227	225.154	251.276	287.791	304.907	334.62	374.513	383.732	411.647	429.311	472.801	527.521	565.003	616.338	653.433	712.582	822.41	826.961	872.927	905.199	930.697

## Sheet: J5R1-131_Ol3 P2h
Sample	J5R1-131	J5R1-131	J5R1-131	J5R1-131	J5R1-131	J5R1-131	J5R1-131	J5R1-131	J5R1-131	J5R1-131	J5R1-131	J5R1-131	J5R1-131	J5R1-131	J5R1-131	J5R1-131	J5R1-131	J5R1-131	J5R1-131	J5R1-131	J5R1-131	J5R1-131	J5R1-131	J5R1-131	J5R1-131
Comment	Ol3-221	Ol3-222	Ol3-223	Ol3-224	Ol3-225	Ol3-227	Ol3-226	Ol3-228	Ol3-229	Ol3-230	Ol3-231	Ol3-233	Ol3-232	Ol3-234	Ol3-235	Ol3-219	Ol3-213	Ol3-211	Ol3-214	Ol3-215	Ol3-218	Ol3-217	Ol3-212	Ol3-220	Ol3-216
wt% Oxides
MgO	41.7068	41.8629	41.7445	41.8279	41.5506	41.4065	41.7708	41.555	41.761	41.7137	41.8633	41.9451	41.2583	41.4124	41.609	41.529	41.5711	41.6007	41.8889	41.5365	41.6807	41.6753	41.646	41.4948	41.9385
Al2O3	0.0156	0.0227	0.0154	0.0369	0.0096	0.0092	0.0016	0.0105	0.0144	0.0147	0.0101	0.0025	0.0517	0.0241	0.0197	0.0142	0.017	0.0179	0.0156	0.0108	0.0174	0.0057	0.0144	0.0284	0.0092
SiO2	38.9896	39.0422	39.2035	39.1444	39.2044	39.1567	39.4362	39.0623	39.1871	39.1788	38.934	38.9261	39.2158	38.7215	39.2376	39.4626	39.2834	39.0432	39.4578	39.1227	39.429	39.295	39.685	39.371	38.7267
CaO	0.035	0.0305	0.0388	0.0304	0.0164	0.0315	0.0378	0.0349	0.0426	0.0335	0.0376	0.033	0.4626	0.0391	0.0386	0.0443	0.0486	0.0403	0.0403	0.0427	0.0341	0.0237	0.0549	0.0344	0.0444
Cr2O3	0.0079	0.0129	0.0277	0	0.0218	0	0.004	0.0089	0.0247	0	0	0	0	0.0238	0	0.0109	0.0069	0.0129	0.001	0.0208	0	0.0079	0.001	0.0109	0.003
MnO	0.2829	0.288	0.2994	0.2595	0.3216	0.2805	0.2832	0.2947	0.3134	0.2774	0.3176	0.3004	0.2775	0.2873	0.2774	0.2798	0.3102	0.3069	0.2792	0.3101	0.2563	0.2865	0.2929	0.2758	0.2612
FeO	18.7931	18.2646	18.5231	18.2879	18.4475	18.6795	18.5071	18.0444	18.5129	18.4402	18.3431	18.1742	18.4344	18.1013	18.4382	18.5838	18.5562	18.2825	18.2234	18.5451	18.1052	18.2141	18.6513	18.4228	17.9952
NiO	0.1911	0.177	0.1786	0.1122	0.1413	0.1495	0.1014	0.1571	0.1446	0.1214	0.1222	0.1322	0.1538	0.1629	0.1114	0.1521	0.1247	0.1471	0.1655	0.1463	0.1247	0.1463	0.123	0.1189	0.1472
Total	100.022	99.7008	100.031	99.6992	99.7132	99.7134	100.142	99.1678	100.001	99.7797	99.6279	99.5135	99.8541	98.7724	99.7319	100.077	99.9181	99.4515	100.072	99.735	99.6474	99.6545	100.469	99.757	99.1254
Distance [µm]	0	46.8143	51.0701	81.2807	112.851	204.583	234.716	256.564	271.525	323.467	357.87	362.619	371.342	467.046	522.945	573.567	585.204	592.4	612.474	614.684	619.123	621.293	629.658	637.41	710.571

## Sheet: J8R2-79_Ol1 P1f
Sample	JR82-79	JR82-79	JR82-79	JR82-79	JR82-79	JR82-79	JR82-79	JR82-79	JR82-79	JR82-79	JR82-79	JR82-79	JR82-79	JR82-79	JR82-79	JR82-79	JR82-79	JR82-79	JR82-79	JR82-79	JR82-79	JR82-79	JR82-79	JR82-79	JR82-79	JR82-79	JR82-79	JR82-79	JR82-79	JR82-79	JR82-79	JR82-79	JR82-79	JR82-79	JR82-79
Comment	Ol1-64	Ol1-65	Ol1-66	Ol1-67	Ol1-68	Ol1-70	Ol1-69	Ol1-71	Ol1-72	Ol1-73	Ol1-74	Ol1-75	Ol1-76	Ol1-77	Ol1-78	Ol1-79	Ol1-80	Ol1-81	Ol1-82	Ol1-83	Ol1-84	Ol1-85	Ol1-86	Ol1-87	Ol1-88	Ol1-89	Ol1-90	Ol1-91	Ol1-92	Ol1-93	Ol1-94	Ol1-95	Ol1-96	Ol1-97	Ol1-98
wt% Oxides
MgO	45.0425	45.0293	45.0513	44.9255	44.7435	44.8602	44.8346	44.8509	44.9599	44.8434	44.9311	45.0146	44.785	44.9255	44.7759	44.8846	44.896	44.8703	44.9377	45.0697	45.1677	45.0747	44.9993	45.1244	45.1147	45.0999	45.008	44.8487	44.8386	44.8942	44.8932	45.1714	45.2102	45.11	44.8851
Al2O3	0.0016	0	0.0007	0.0016	0	0.0131	0.0259	0.0007	0.0018	0.0163	0.0055	0.0078	0.0048	0.0138	0.0028	0.0218	0.0101	0.0145	0.0053	0.0018	0.0115	0.0053	0.0048	0.0147	0.0067	0.0034	0.0101	0.0158	0	0.0074	0.0009	0.0028	0	0.0196	0
SiO2	40.2623	40.122	40.1649	40.2914	40.1855	40.2792	40.4035	40.1017	40.3143	40.1738	40.0972	40.0077	39.8438	39.8295	39.8004	39.897	39.6971	39.9815	39.9072	40.0201	39.942	40.2026	40.1909	40.4724	39.9884	39.8793	40.1195	40.4587	40.1954	39.9391	40.2276	40.269	40.2946	39.9373	40.1589
CaO	0.0342	0.0363	0.0285	0.0363	0.0306	0.0293	0.0317	0.0356	0.0365	0.0295	0.037	0.0273	0.0345	0.0327	0.0405	0.0289	0.0434	0.0295	0.0287	0.028	0.0271	0.0336	0.0334	0.0315	0.0418	0.0268	0.0364	0.0279	0.0244	0.0173	0.0168	0.0256	0.0262	0.0321	0.0308
Cr2O3	0	0.0101	0.002	0.0343	0.0151	0.004	0.003	0	0.0302	0.002	0.007	0.006	0.0151	0	0.0171	0	0.0302	0.0191	0	0	0.007	0.0302	0.002	0.0171	0.0372	0.0181	0	0.006	0.004	0.007	0.0262	0.0181	0.0161	0	0
MnO	0.259	0.226	0.245	0.227	0.2408	0.2162	0.2452	0.2327	0.1947	0.2543	0.2417	0.227	0.2565	0.2013	0.1971	0.2104	0.2129	0.2319	0.2376	0.222	0.1947	0.2245	0.2087	0.213	0.2507	0.2533	0.244	0.2014	0.2261	0.2327	0.2055	0.2319	0.2318	0.2469	0.2303
FeO	14.4095	14.1961	14.345	13.9872	14.5037	14.2553	14.0449	13.9895	14.4893	13.989	14.2151	14.039	14.212	14.0327	14.42	14.1406	14.2681	14.0763	14.3043	14.093	14.4495	14.212	14.3554	14.2484	14.5121	14.2715	14.7419	14.1853	14.2919	14.2702	14.3919	14.1569	14.3785	14.1704	14.2846
NiO	0.1394	0.1419	0.1327	0.1086	0.1052	0.0768	0.1261	0.1219	0.0993	0.1144	0.187	0.1328	0.177	0.1277	0.1394	0.1545	0.1186	0.0994	0.137	0.1077	0.1219	0.096	0.1503	0.1495	0.1778	0.1194	0.141	0.1478	0.1294	0.1186	0.1061	0.1186	0.1971	0.1261	0.1044
Total	100.148	99.7617	99.9701	99.6119	99.8244	99.7341	99.7149	99.333	100.126	99.4227	99.7216	99.4622	99.3287	99.1632	99.3932	99.3378	99.2764	99.3225	99.5578	99.5423	99.9214	99.8789	99.9448	100.271	100.129	99.6717	100.301	99.8916	99.7098	99.4865	99.8682	99.9943	100.355	99.6424	99.6941
Distance [µm]	4.54747e-13	2.81599	19.7969	56.5561	78.4365	102.539	115.927	131.535	151.352	176.825	212.829	240.413	253.175	272.281	293.452	297.708	328.143	362.767	416.488	443.38	487.247	526.832	538.176	566.462	606.765	644.954	678.18	728.371	795.504	808.251	835.849	875.421	903.726	943.297	965.201

## Sheet: J8R2-79_Ol2 P1f
Sample	JR82-79	JR82-79	JR82-79	JR82-79	JR82-79	JR82-79	JR82-79	JR82-79	JR82-79	JR82-79	JR82-79	JR82-79	JR82-79	JR82-79	JR82-79	JR82-79	JR82-79	JR82-79	JR82-79	JR82-79
Comment	Ol2-44	Ol2-45	Ol2-46	Ol2-47	Ol2-49	Ol2-48	Ol2-50	Ol2-51	Ol2-52	Ol2-54	Ol2-53	Ol2-55	Ol2-57	Ol2-56	Ol2-58	Ol2-59	Ol2-60	Ol2-61	Ol2-62	Ol2-63
wt% Oxides
MgO	45.1237	44.8973	45.1861	45.2124	45.0229	44.9598	44.9421	45.0756	46.0944	44.9118	45.0869	44.9467	45.0179	45.091	45.0458	45.0338	45.0827	45.0083	44.7557	44.9121
Al2O3	0.0159	0.017	0.0103	0.0106	0.008	0.0198	0.0156	0.0177	0	0.0018	0.0023	0.0191	0.0085	0.0133	0.0051	0.0101	0.0119	0	0.003	0.0037
SiO2	40.2222	40.0715	40.2598	40.1991	39.8412	40.0616	40.0926	40.2538	40.3895	40.3248	40.4049	40.3224	40.1464	40.1289	40.2958	40.3033	40.2607	40.0217	40.1604	40.2957
CaO	0.0325	0.0259	0.0332	0.0443	0.0264	0.0286	0.0337	0.0325	0.031	0.0368	0.026	0.0332	0.0331	0.0224	0.0486	0.0296	0.0367	0.0255	0.036	0.0488
Cr2O3	0.0111	0.002	0.0111	0	0.007	0	0	0	0	0	0	0	0.002	0	0.001	0	0.0151	0.0171	0	0
MnO	0.198	0.2409	0.2516	0.2566	0.1996	0.2467	0.245	0.2212	0.2225	0.2533	0.2302	0.2253	0.2318	0.254	0.1807	0.2672	0.2013	0.2484	0.2195	0.2328
FeO	14.3171	14.1655	14.2572	14.2234	14.2952	14.2147	14.3011	14.0136	13.1332	14.0699	14.2835	14.1591	14.2623	14.4512	14.3885	14.3657	14.2625	14.0389	14.1367	13.8988
NiO	0.1294	0.1528	0.1402	0.1478	0.1277	0.1235	0.1386	0.1645	0.1321	0.1269	0.1269	0.1144	0.1653	0.1444	0.1545	0.1753	0.1261	0.1228	0.091	0.1386
Total	100.05	99.5729	100.149	100.094	99.528	99.6547	99.7687	99.7789	100.003	99.7253	100.161	99.8202	99.8673	100.105	100.12	100.185	99.997	99.4827	99.4023	99.5305
Distance [µm]	4.54747e-13	18.9164	31.301	38.8475	49.587	67.6629	82.3691	113.837	143.795	168.777	189.015	225.444	230.056	245.529	268.824	303.885	327.383	341.43	367.158	390.244

[truncated: 25 more sheets: J8R2-79_Ol3 P1f, J9R1-13_Ol1 P1f, J9R1-13_Ol2 P2h, J10R1-49_Ol1 P1h, J10R1-49_Ol2 P1f, J10R1-49_Ol2 P2f, J10R1-49_Ol2 P3h, J10R1-49_Ol3 P1h, J10R1-49_Ol3 P2h, J10R1-49_Ol4 P1h, J25G1-32_Ol1 P1f, J25G1-32_Ol2 P1h, J25G1-32_Ol3 P1f, J25G1-32_Ol3 P2h, P3R1-31_Ol1 P1h, P3R1-31_Ol1 P2h, P3R1-31_Ol2 P1f, P4G1-5_Ol1 P1h, P4G1-5_Ol1 P2h, P4G1-5_Ol2 P1h …]
